# Supplementary material for: Efficacy and Safety of CAR-T Therapy for Relapse or Refractory Multiple Myeloma: A systematic review and meta-analysis
Source: PubMed Central journal article supplement (PMC7976586; doi:10.7150/ijms.46811), 2021-02-18

|                                                                        |               |               |          |               |               |               |               |               |               |               |               |          |
|------------------------------------------------------------------------|---------------|---------------|----------|---------------|---------------|---------------|---------------|---------------|---------------|---------------|---------------|----------|
| Without performing selective outcome reporting                         | Yes           | Partial       | Yes      | Partial       | Partial       | Partial       | Partial       | Partial       | Partial       | Partial       | Partial       | Yes      |
| Details of statistical tests reported                                  | Yes           | Yes           | No       | No            | No            | No            | No            | No            | No            | No            | No            | Yes      |
| Length of follow-up reported                                           | Yes           | Yes           | Yes      | No            | Yes           | Yes           |               | Yes           | Yes           | Yes           | Yes           | Yes      |
| Eestimates of random variability in data analysis of relevant outcomes | No            | No            | Yes      | No            | No            | No            | No            | No            | No            | No            | No            | Yes      |
| Adverse events reported                                                | Yes           | Partial       | Yes      | Partial       | Yes           | Partial       | Partial       | Partial       | Partial       | Yes           | Partial       | Yes      |
| Competing interests and sources of support reported                    | Partial       | No            | Yes      | No            | No            | No            | No            | No            | No            | No            | Partial       | Unclear  |
| Risk of bias                                                           | Moderate risk | Moderate risk | Low risk | Moderate risk | Moderate risk | Moderate risk | Moderate risk | Moderate risk | Moderate risk | Moderate risk | Moderate risk | Low risk |

| <b>Question Text</b>                  | <b>Xu 2019</b> | <b>Li 2019</b> | <b>Cohen 2019</b> | <b>Han 2019</b> | <b>Guo 2016</b> | <b>Ramos 2016</b> | <b>Garfall 2018</b> | <b>Yan 2017</b> | <b>Baumeister 2018</b> | <b>Li 2019</b> | <b>Popat 2019</b> | <b>Yan 2019</b> |
|---------------------------------------|----------------|----------------|-------------------|-----------------|-----------------|-------------------|---------------------|-----------------|------------------------|----------------|-------------------|-----------------|
| Was the aim clearly stated            | Yes            | Yes            | Yes               | Yes             | Yes             | Yes               | Yes                 | Yes             | Yes                    | Yes            | Yes               | Yes             |
| Prospective                           | Yes            | Yes            | Yes               | Yes             | Yes             | Yes               | Yes                 | Yes             | Yes                    | Yes            | Yes               | Yes             |
| Multicenter                           | Yes            | No             | No                | No              | No              | Yes               | No                  | No              | No                     | Unclear        | Yes               | No              |
| Consecutive recruitment               | Yes            | Yes            | Yes               | Yes             | Yes             | Yes               | Yes                 | Yes             | Yes                    | Yes            | Yes               | Yes             |
| Eligibility criteria clearly stated   | Yes            | Yes            | Yes               | Yes             | Yes             | Yes               | Yes                 | Yes             | Yes                    | Yes            | Yes               | Yes             |
| Characteristics of patients described | Yes            | Partial        | Yes               | Partial         | Partial         | Yes               | Yes                 | Partial         | Partial                | Partial        | Partial           | Yes             |

|                                                                       |         |         |         |         |         |         |         |         |         |         |         |     |
|-----------------------------------------------------------------------|---------|---------|---------|---------|---------|---------|---------|---------|---------|---------|---------|-----|
| Did patients enter the study at a similar point in the disease        | Yes     | Yes     | Yes     | Yes     | Yes     | Yes     | Yes     | Yes     | Yes     | Yes     | Yes     | Yes |
| Intervention of interest described                                    | Partial | Partial | Yes     | Partial | Yes     | Yes     | Yes     | Partial | Partial | Partial | Partial | Yes |
| Additional interventions clearly described                            | No      | No      | No      | No      | No      | No      | Yes     | No      | Yes     | No      | No      | No  |
| Outcome measures established a priori                                 | Yes     | Yes     | Yes     | Yes     | Yes     | Yes     | Yes     | Yes     | Yes     | Yes     | Yes     | Yes |
| Outcome assessed blinded to intervention status                       | Yes     | Yes     | Yes     | Yes     | Yes     | Yes     | Yes     | Yes     | Yes     | Yes     | Yes     | Yes |
| All relevant outcomes measured appropriately                          | Yes     | Yes     | Yes     | Partial | Yes     | Partial | Yes     | Yes     | Yes     | Yes     | Yes     | Yes |
| Relevant outcomes measured before and after the intervention          | Yes     | Yes     | Yes     | Yes     | Yes     | Yes     | Yes     | Yes     | Yes     | Yes     | Yes     | Yes |
| Without performing selective outcome reporting                        | Partial | Partial | Partial | Partial | Partial | Partial | Partial | Partial | Partial | Partial | Partial | Yes |
| Details of statistical tests reported                                 | Yes     | No      | Yes     | No      | Yes     | Yes     | Yes     | No      | Yes     | No      | No      | Yes |
| Length of follow-up reported                                          | Yes     | Yes     | Yes     | Yes     | Yes     | Yes     | Yes     | Yes     | Yes     | Yes     | Yes     | Yes |
| Estimates of random variability in data analysis of relevant outcomes | Yes     | No      | Yes     | No      | No      | No      | No      | No      | No      | No      | No      | No  |
| Adverse events reported                                               | Partial | Partial | Yes     | Partial | Partial | Partial | Yes     | Partial | Yes     | Partial | Partial | Yes |
| Competing interests and sources of support reported                   | Unclear | Unclear | Yes     | No      | Yes     | Yes     | Yes     | No      | Yes     | No      | No      | Yes |

|              |          |               |          |               |               |          |          |               |          |               |               |               |
|--------------|----------|---------------|----------|---------------|---------------|----------|----------|---------------|----------|---------------|---------------|---------------|
| Risk of bias | Low risk | Moderate risk | Low risk | Moderate risk | Moderate risk | Low risk | Low risk | Moderate risk | Low risk | Moderate risk | Moderate risk | Moderate risk |
|--------------|----------|---------------|----------|---------------|---------------|----------|----------|---------------|----------|---------------|---------------|---------------|



Figure S1 Subgroup analysis of Overall Response for RRMM with CAR-T.

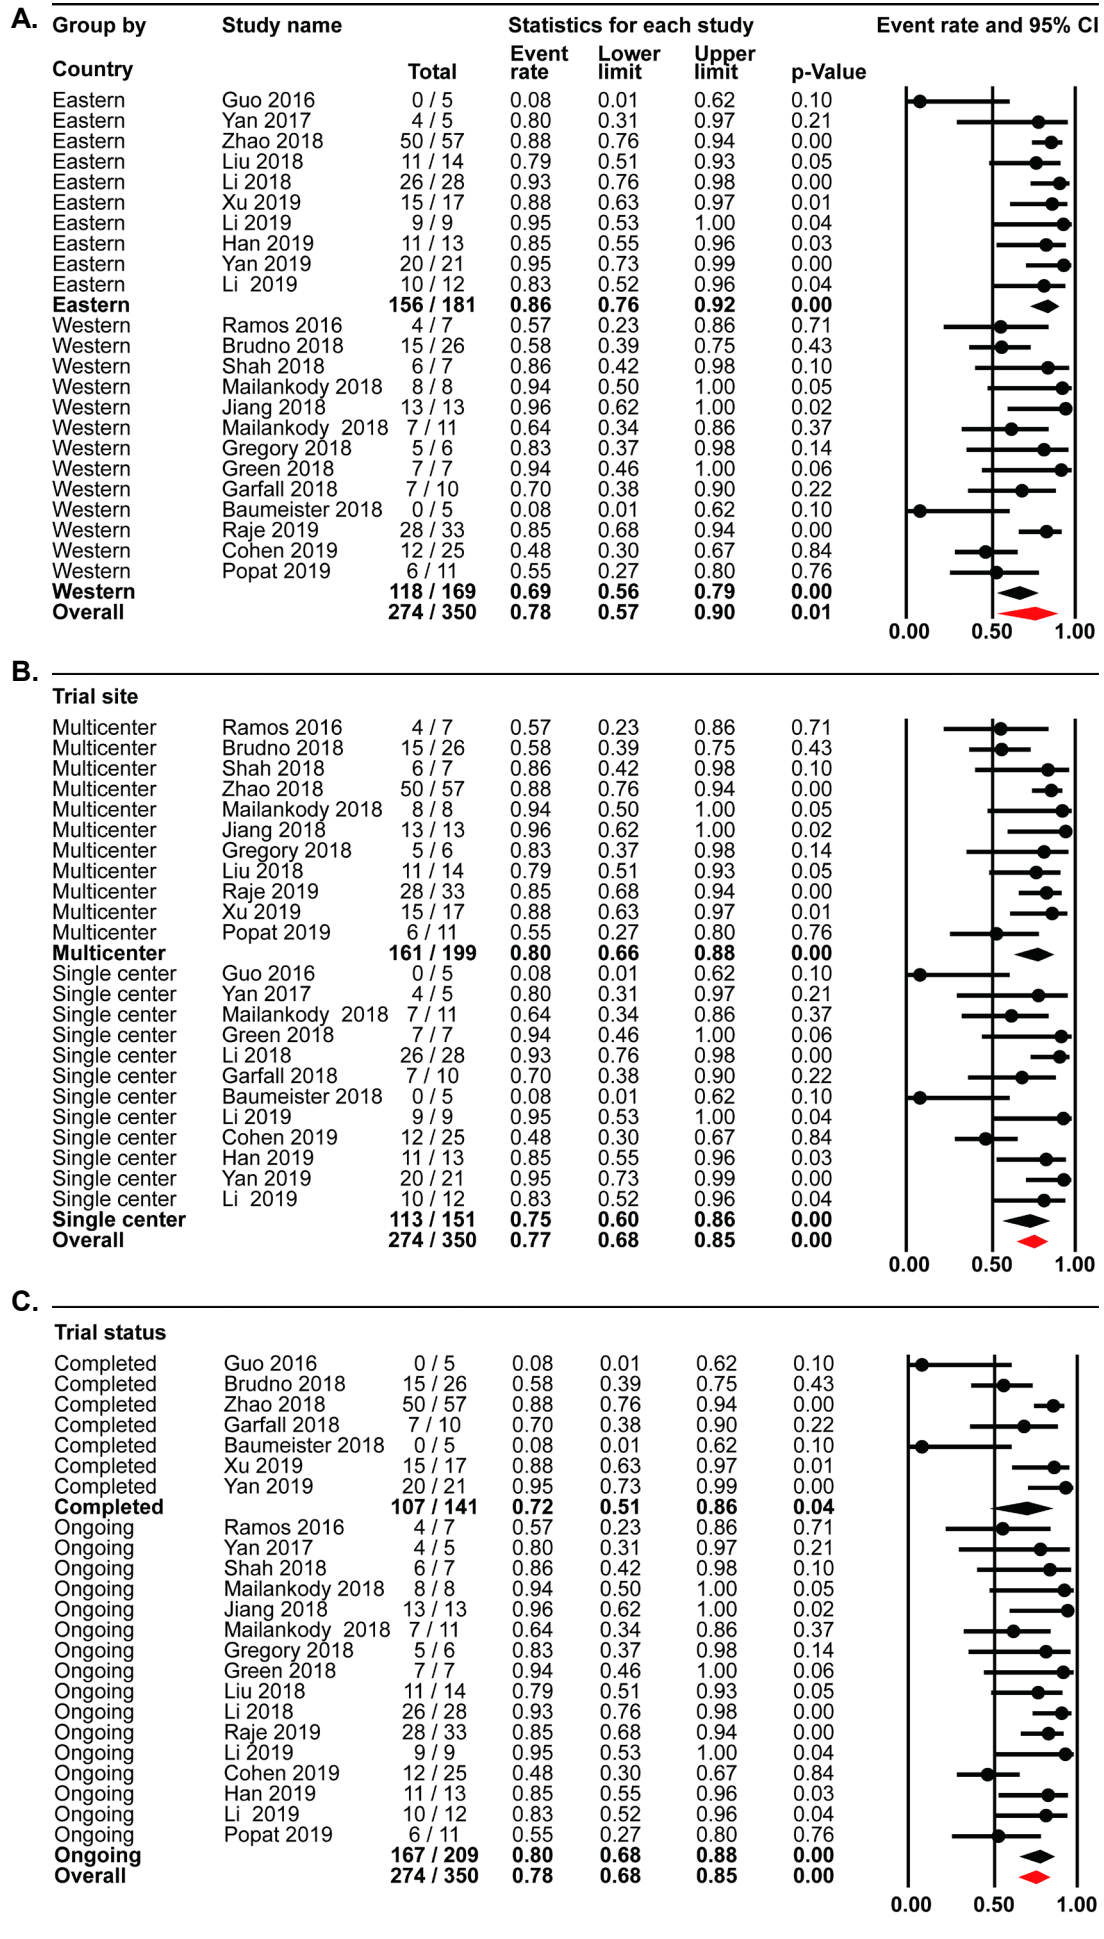

#### D. scFv origin

|                  |                 |                  |             |             |             |             |
|------------------|-----------------|------------------|-------------|-------------|-------------|-------------|
| Human            | Guo 2016        | 0 / 5            | 0.08        | 0.01        | 0.62        | 0.10        |
| Human            | Mailankody 2018 | 8 / 8            | 0.94        | 0.50        | 1.00        | 0.05        |
| Human            | Jiang 2018      | 13 / 13          | 0.96        | 0.62        | 1.00        | 0.02        |
| Human            | Mailankody 2018 | 7 / 11           | 0.64        | 0.34        | 0.86        | 0.37        |
| Human            | Gregory 2018    | 5 / 6            | 0.83        | 0.37        | 0.98        | 0.14        |
| Human            | Green 2018      | 7 / 7            | 0.94        | 0.46        | 1.00        | 0.06        |
| Human            | Li 2019         | 9 / 9            | 0.95        | 0.53        | 1.00        | 0.04        |
| Human            | Cohen 2019      | 12 / 25          | 0.48        | 0.30        | 0.67        | 0.84        |
| <b>Human</b>     |                 | <b>61 / 84</b>   | <b>0.74</b> | <b>0.53</b> | <b>0.87</b> | <b>0.03</b> |
| Non-human        | Ramos 2016      | 4 / 7            | 0.57        | 0.23        | 0.86        | 0.71        |
| Non-human        | Yan 2017        | 4 / 5            | 0.80        | 0.31        | 0.97        | 0.21        |
| Non-human        | Brudno 2018     | 15 / 26          | 0.58        | 0.39        | 0.75        | 0.43        |
| Non-human        | Shah 2018       | 6 / 7            | 0.86        | 0.42        | 0.98        | 0.10        |
| Non-human        | Zhao 2018       | 50 / 57          | 0.88        | 0.76        | 0.94        | 0.00        |
| Non-human        | Liu 2018        | 11 / 14          | 0.79        | 0.51        | 0.93        | 0.05        |
| Non-human        | Li 2018         | 26 / 28          | 0.93        | 0.76        | 0.98        | 0.00        |
| Non-human        | Raje 2019       | 28 / 33          | 0.85        | 0.68        | 0.94        | 0.00        |
| Non-human        | Xu 2019         | 15 / 17          | 0.88        | 0.63        | 0.97        | 0.01        |
| Non-human        | Han 2019        | 11 / 13          | 0.85        | 0.55        | 0.96        | 0.03        |
| Non-human        | Yan 2019        | 20 / 21          | 0.95        | 0.73        | 0.99        | 0.00        |
| <b>Non-human</b> |                 | <b>190 / 228</b> | <b>0.83</b> | <b>0.72</b> | <b>0.90</b> | <b>0.00</b> |
| <b>Overall</b>   |                 | <b>251 / 312</b> | <b>0.80</b> | <b>0.71</b> | <b>0.87</b> | <b>0.00</b> |

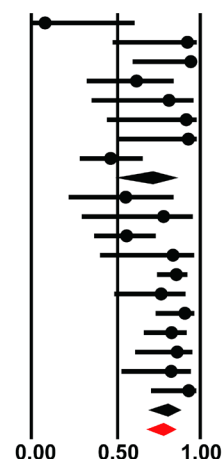

#### E. Co-stimulatory domain

|                |                 |                  |             |             |             |             |
|----------------|-----------------|------------------|-------------|-------------|-------------|-------------|
| 4-1BB          | Guo 2016        | 0 / 5            | 0.08        | 0.01        | 0.62        | 0.10        |
| 4-1BB          | Shah 2018       | 6 / 7            | 0.86        | 0.42        | 0.98        | 0.10        |
| 4-1BB          | Zhao 2018       | 50 / 57          | 0.88        | 0.76        | 0.94        | 0.00        |
| 4-1BB          | Mailankody 2018 | 8 / 8            | 0.94        | 0.50        | 1.00        | 0.05        |
| 4-1BB          | Jiang 2018      | 13 / 13          | 0.96        | 0.62        | 1.00        | 0.02        |
| 4-1BB          | Mailankody 2018 | 7 / 11           | 0.64        | 0.34        | 0.86        | 0.37        |
| 4-1BB          | Gregory 2018    | 5 / 6            | 0.83        | 0.37        | 0.98        | 0.14        |
| 4-1BB          | Green 2018      | 7 / 7            | 0.94        | 0.46        | 1.00        | 0.06        |
| 4-1BB          | Liu 2018        | 11 / 14          | 0.79        | 0.51        | 0.93        | 0.05        |
| 4-1BB          | Garfall 2018    | 7 / 10           | 0.70        | 0.38        | 0.90        | 0.22        |
| 4-1BB          | Raje 2019       | 28 / 33          | 0.85        | 0.68        | 0.94        | 0.00        |
| 4-1BB          | Xu 2019         | 15 / 17          | 0.88        | 0.63        | 0.97        | 0.01        |
| 4-1BB          | Li 2019         | 9 / 9            | 0.95        | 0.53        | 1.00        | 0.04        |
| 4-1BB          | Cohen 2019      | 12 / 25          | 0.48        | 0.30        | 0.67        | 0.84        |
| 4-1BB          | Han 2019        | 11 / 13          | 0.85        | 0.55        | 0.96        | 0.03        |
| 4-1BB          | Yan 2019        | 20 / 21          | 0.95        | 0.73        | 0.99        | 0.00        |
| <b>4-1BB</b>   |                 | <b>209 / 256</b> | <b>0.81</b> | <b>0.71</b> | <b>0.89</b> | <b>0.00</b> |
| CD28           | Ramos 2016      | 4 / 7            | 0.57        | 0.23        | 0.86        | 0.71        |
| CD28           | Brudno 2018     | 15 / 26          | 0.58        | 0.39        | 0.75        | 0.43        |
| CD28           | Li 2018         | 26 / 28          | 0.93        | 0.76        | 0.98        | 0.00        |
| <b>CD28</b>    |                 | <b>45 / 61</b>   | <b>0.72</b> | <b>0.45</b> | <b>0.90</b> | <b>0.11</b> |
| <b>Overall</b> |                 | <b>254 / 317</b> | <b>0.80</b> | <b>0.70</b> | <b>0.87</b> | <b>0.00</b> |

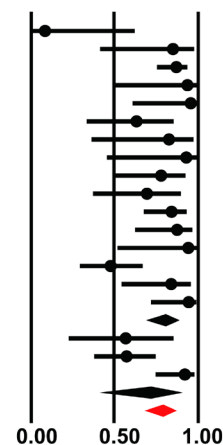

#### F. CARs

|                       |                 |                  |             |             |             |             |
|-----------------------|-----------------|------------------|-------------|-------------|-------------|-------------|
| 2nd generation        | Guo 2016        | 0 / 5            | 0.08        | 0.01        | 0.62        | 0.10        |
| 2nd generation        | Ramos 2016      | 4 / 7            | 0.57        | 0.23        | 0.86        | 0.71        |
| 2nd generation        | Brudno 2018     | 15 / 26          | 0.58        | 0.39        | 0.75        | 0.43        |
| 2nd generation        | Shah 2018       | 6 / 7            | 0.86        | 0.42        | 0.98        | 0.10        |
| 2nd generation        | Zhao 2018       | 50 / 57          | 0.88        | 0.76        | 0.94        | 0.00        |
| 2nd generation        | Mailankody 2018 | 8 / 8            | 0.94        | 0.50        | 1.00        | 0.05        |
| 2nd generation        | Jiang 2018      | 13 / 13          | 0.96        | 0.62        | 1.00        | 0.02        |
| 2nd generation        | Mailankody 2018 | 7 / 11           | 0.64        | 0.34        | 0.86        | 0.37        |
| 2nd generation        | Gregory 2018    | 5 / 6            | 0.83        | 0.37        | 0.98        | 0.14        |
| 2nd generation        | Green 2018      | 7 / 7            | 0.94        | 0.46        | 1.00        | 0.06        |
| 2nd generation        | Liu 2018        | 11 / 14          | 0.79        | 0.51        | 0.93        | 0.05        |
| 2nd generation        | Garfall 2018    | 7 / 10           | 0.70        | 0.38        | 0.90        | 0.22        |
| 2nd generation        | Baumeister 2018 | 0 / 5            | 0.08        | 0.01        | 0.62        | 0.10        |
| 2nd generation        | Li 2018         | 26 / 28          | 0.93        | 0.76        | 0.98        | 0.00        |
| 2nd generation        | Raje 2019       | 28 / 33          | 0.85        | 0.68        | 0.94        | 0.00        |
| 2nd generation        | Xu 2019         | 15 / 17          | 0.88        | 0.63        | 0.97        | 0.01        |
| 2nd generation        | Li 2019         | 9 / 9            | 0.95        | 0.53        | 1.00        | 0.04        |
| 2nd generation        | Cohen 2019      | 12 / 25          | 0.48        | 0.30        | 0.67        | 0.84        |
| 2nd generation        | Han 2019        | 11 / 13          | 0.85        | 0.55        | 0.96        | 0.03        |
| 2nd generation        | Yan 2019        | 20 / 21          | 0.95        | 0.73        | 0.99        | 0.00        |
| <b>2nd generation</b> |                 | <b>254 / 322</b> | <b>0.78</b> | <b>0.68</b> | <b>0.86</b> | <b>0.00</b> |
| 3rd generation        | Yan 2017        | 4 / 5            | 0.80        | 0.31        | 0.97        | 0.21        |
| 3rd generation        | Popat 2019      | 6 / 11           | 0.55        | 0.27        | 0.80        | 0.76        |
| <b>3rd generation</b> |                 | <b>10 / 16</b>   | <b>0.65</b> | <b>0.26</b> | <b>0.91</b> | <b>0.47</b> |
| <b>Overall</b>        |                 | <b>264 / 338</b> | <b>0.77</b> | <b>0.67</b> | <b>0.85</b> | <b>0.00</b> |

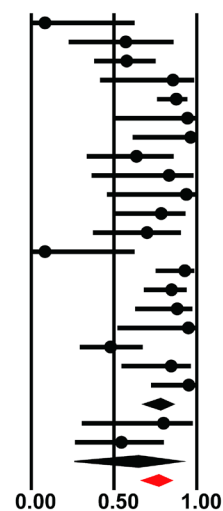

### G. Antigen target

|                 |                 |                  |             |             |             |             |
|-----------------|-----------------|------------------|-------------|-------------|-------------|-------------|
| BCMA            | Brudno 2018     | 15 / 26          | 0.58        | 0.39        | 0.75        | 0.43        |
| BCMA            | Shah 2018       | 6 / 7            | 0.86        | 0.42        | 0.98        | 0.10        |
| BCMA            | Zhao 2018       | 50 / 57          | 0.88        | 0.76        | 0.94        | 0.00        |
| BCMA            | Mailankody 2018 | 8 / 8            | 0.94        | 0.50        | 1.00        | 0.05        |
| BCMA            | Jiang 2018      | 13 / 13          | 0.96        | 0.62        | 1.00        | 0.02        |
| BCMA            | Mailankody 2018 | 7 / 11           | 0.64        | 0.34        | 0.86        | 0.37        |
| BCMA            | Gregory 2018    | 5 / 6            | 0.83        | 0.37        | 0.98        | 0.14        |
| BCMA            | Green 2018      | 7 / 7            | 0.94        | 0.46        | 1.00        | 0.06        |
| BCMA            | Liu 2018        | 11 / 14          | 0.79        | 0.51        | 0.93        | 0.05        |
| BCMA            | Li 2018         | 26 / 28          | 0.93        | 0.76        | 0.98        | 0.00        |
| BCMA            | Raje 2019       | 28 / 33          | 0.85        | 0.68        | 0.94        | 0.00        |
| BCMA            | Xu 2019         | 15 / 17          | 0.88        | 0.63        | 0.97        | 0.01        |
| BCMA            | Li 2019         | 9 / 9            | 0.95        | 0.53        | 1.00        | 0.04        |
| BCMA            | Cohen 2019      | 12 / 25          | 0.48        | 0.30        | 0.67        | 0.84        |
| BCMA            | Han 2019        | 11 / 13          | 0.85        | 0.55        | 0.96        | 0.03        |
| <b>BCMA</b>     |                 | <b>223 / 274</b> | <b>0.82</b> | <b>0.72</b> | <b>0.89</b> | <b>0.00</b> |
| Non-BCMA        | Guo 2016        | 0 / 5            | 0.08        | 0.01        | 0.62        | 0.10        |
| Non-BCMA        | Ramos 2016      | 4 / 7            | 0.57        | 0.23        | 0.86        | 0.71        |
| Non-BCMA        | Garfall 2018    | 7 / 10           | 0.70        | 0.38        | 0.90        | 0.22        |
| Non-BCMA        | Baumeister 2018 | 0 / 5            | 0.08        | 0.01        | 0.62        | 0.10        |
| <b>Non-BCMA</b> |                 | <b>11 / 27</b>   | <b>0.43</b> | <b>0.18</b> | <b>0.72</b> | <b>0.65</b> |
| <b>Overall</b>  |                 | <b>234 / 301</b> | <b>0.67</b> | <b>0.26</b> | <b>0.92</b> | <b>0.43</b> |

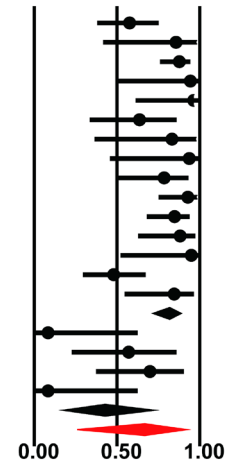

### H. CAR-T regimen

|                              |                 |                  |             |             |             |             |
|------------------------------|-----------------|------------------|-------------|-------------|-------------|-------------|
| Anti-BCMA contained          | Yan 2017        | 4 / 5            | 0.80        | 0.31        | 0.97        | 0.21        |
| Anti-BCMA contained          | Brudno 2018     | 15 / 26          | 0.58        | 0.39        | 0.75        | 0.43        |
| Anti-BCMA contained          | Shah 2018       | 6 / 7            | 0.86        | 0.42        | 0.98        | 0.10        |
| Anti-BCMA contained          | Zhao 2018       | 50 / 57          | 0.88        | 0.76        | 0.94        | 0.00        |
| Anti-BCMA contained          | Mailankody 2018 | 8 / 8            | 0.94        | 0.50        | 1.00        | 0.05        |
| Anti-BCMA contained          | Jiang 2018      | 13 / 13          | 0.96        | 0.62        | 1.00        | 0.02        |
| Anti-BCMA contained          | Mailankody 2018 | 7 / 11           | 0.64        | 0.34        | 0.86        | 0.37        |
| Anti-BCMA contained          | Gregory 2018    | 5 / 6            | 0.83        | 0.37        | 0.98        | 0.14        |
| Anti-BCMA contained          | Green 2018      | 7 / 7            | 0.94        | 0.46        | 1.00        | 0.06        |
| Anti-BCMA contained          | Liu 2018        | 11 / 14          | 0.79        | 0.51        | 0.93        | 0.05        |
| Anti-BCMA contained          | Li 2018         | 26 / 28          | 0.93        | 0.76        | 0.98        | 0.00        |
| Anti-BCMA contained          | Raje 2019       | 28 / 33          | 0.85        | 0.68        | 0.94        | 0.00        |
| Anti-BCMA contained          | Xu 2019         | 15 / 17          | 0.88        | 0.63        | 0.97        | 0.01        |
| Anti-BCMA contained          | Li 2019         | 9 / 9            | 0.95        | 0.53        | 1.00        | 0.04        |
| Anti-BCMA contained          | Cohen 2019      | 12 / 25          | 0.48        | 0.30        | 0.67        | 0.84        |
| Anti-BCMA contained          | Han 2019        | 11 / 13          | 0.85        | 0.55        | 0.96        | 0.03        |
| Anti-BCMA contained          | Yan 2019        | 20 / 21          | 0.95        | 0.73        | 0.99        | 0.00        |
| Anti-BCMA contained          | Li 2019         | 10 / 12          | 0.83        | 0.52        | 0.96        | 0.04        |
| Anti-BCMA contained          | Popat 2019      | 6 / 11           | 0.55        | 0.27        | 0.80        | 0.76        |
| <b>Anti-BCMA contained</b>   |                 | <b>263 / 323</b> | <b>0.81</b> | <b>0.73</b> | <b>0.88</b> | <b>0.00</b> |
| Anti-BCMA uncontained        | Guo 2016        | 0 / 5            | 0.08        | 0.01        | 0.62        | 0.10        |
| Anti-BCMA uncontained        | Ramos 2016      | 4 / 7            | 0.57        | 0.23        | 0.86        | 0.71        |
| Anti-BCMA uncontained        | Garfall 2018    | 7 / 10           | 0.70        | 0.38        | 0.90        | 0.22        |
| Anti-BCMA uncontained        | Baumeister 2018 | 0 / 5            | 0.08        | 0.01        | 0.62        | 0.10        |
| <b>Anti-BCMA uncontained</b> |                 | <b>11 / 27</b>   | <b>0.43</b> | <b>0.18</b> | <b>0.72</b> | <b>0.66</b> |
| <b>Overall</b>               |                 | <b>274 / 350</b> | <b>0.67</b> | <b>0.27</b> | <b>0.92</b> | <b>0.42</b> |

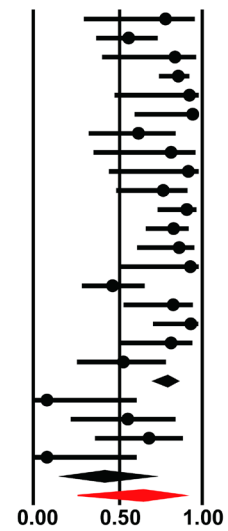

### I. CAR-T therapy mode

|                      |                 |                  |             |             |             |             |
|----------------------|-----------------|------------------|-------------|-------------|-------------|-------------|
| Dual target          | Yan 2017        | 4 / 5            | 0.80        | 0.31        | 0.97        | 0.21        |
| Dual target          | Yan 2019        | 20 / 21          | 0.95        | 0.73        | 0.99        | 0.00        |
| Dual target          | Li 2019         | 10 / 12          | 0.83        | 0.52        | 0.96        | 0.04        |
| Dual target          | Popat 2019      | 6 / 11           | 0.55        | 0.27        | 0.80        | 0.76        |
| <b>Dual target</b>   |                 | <b>40 / 49</b>   | <b>0.80</b> | <b>0.55</b> | <b>0.93</b> | <b>0.02</b> |
| Single target        | Guo 2016        | 0 / 5            | 0.08        | 0.01        | 0.62        | 0.10        |
| Single target        | Ramos 2016      | 4 / 7            | 0.57        | 0.23        | 0.86        | 0.71        |
| Single target        | Brudno 2018     | 15 / 26          | 0.58        | 0.39        | 0.75        | 0.43        |
| Single target        | Shah 2018       | 6 / 7            | 0.86        | 0.42        | 0.98        | 0.10        |
| Single target        | Zhao 2018       | 50 / 57          | 0.88        | 0.76        | 0.94        | 0.00        |
| Single target        | Mailankody 2018 | 8 / 8            | 0.94        | 0.50        | 1.00        | 0.05        |
| Single target        | Jiang 2018      | 13 / 13          | 0.96        | 0.62        | 1.00        | 0.02        |
| Single target        | Mailankody 2018 | 7 / 11           | 0.64        | 0.34        | 0.86        | 0.37        |
| Single target        | Gregory 2018    | 5 / 6            | 0.83        | 0.37        | 0.98        | 0.14        |
| Single target        | Green 2018      | 7 / 7            | 0.94        | 0.46        | 1.00        | 0.06        |
| Single target        | Liu 2018        | 11 / 14          | 0.79        | 0.51        | 0.93        | 0.05        |
| Single target        | Li 2018         | 26 / 28          | 0.93        | 0.76        | 0.98        | 0.00        |
| Single target        | Garfall 2018    | 7 / 10           | 0.70        | 0.38        | 0.90        | 0.22        |
| Single target        | Baumeister 2018 | 0 / 5            | 0.08        | 0.01        | 0.62        | 0.10        |
| Single target        | Raje 2019       | 28 / 33          | 0.85        | 0.68        | 0.94        | 0.00        |
| Single target        | Xu 2019         | 15 / 17          | 0.88        | 0.63        | 0.97        | 0.01        |
| Single target        | Li 2019         | 9 / 9            | 0.95        | 0.53        | 1.00        | 0.04        |
| Single target        | Cohen 2019      | 12 / 25          | 0.48        | 0.30        | 0.67        | 0.84        |
| Single target        | Han 2019        | 11 / 13          | 0.85        | 0.55        | 0.96        | 0.03        |
| <b>Single target</b> |                 | <b>234 / 301</b> | <b>0.77</b> | <b>0.66</b> | <b>0.85</b> | <b>0.00</b> |
| <b>Overall</b>       |                 | <b>274 / 350</b> | <b>0.77</b> | <b>0.68</b> | <b>0.85</b> | <b>0.00</b> |

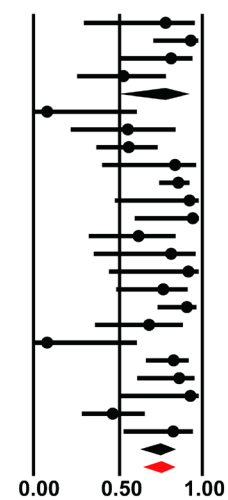



Figure S2 Subgroup analysis of CRS grade 3-4 for RRMM with CAR-T.

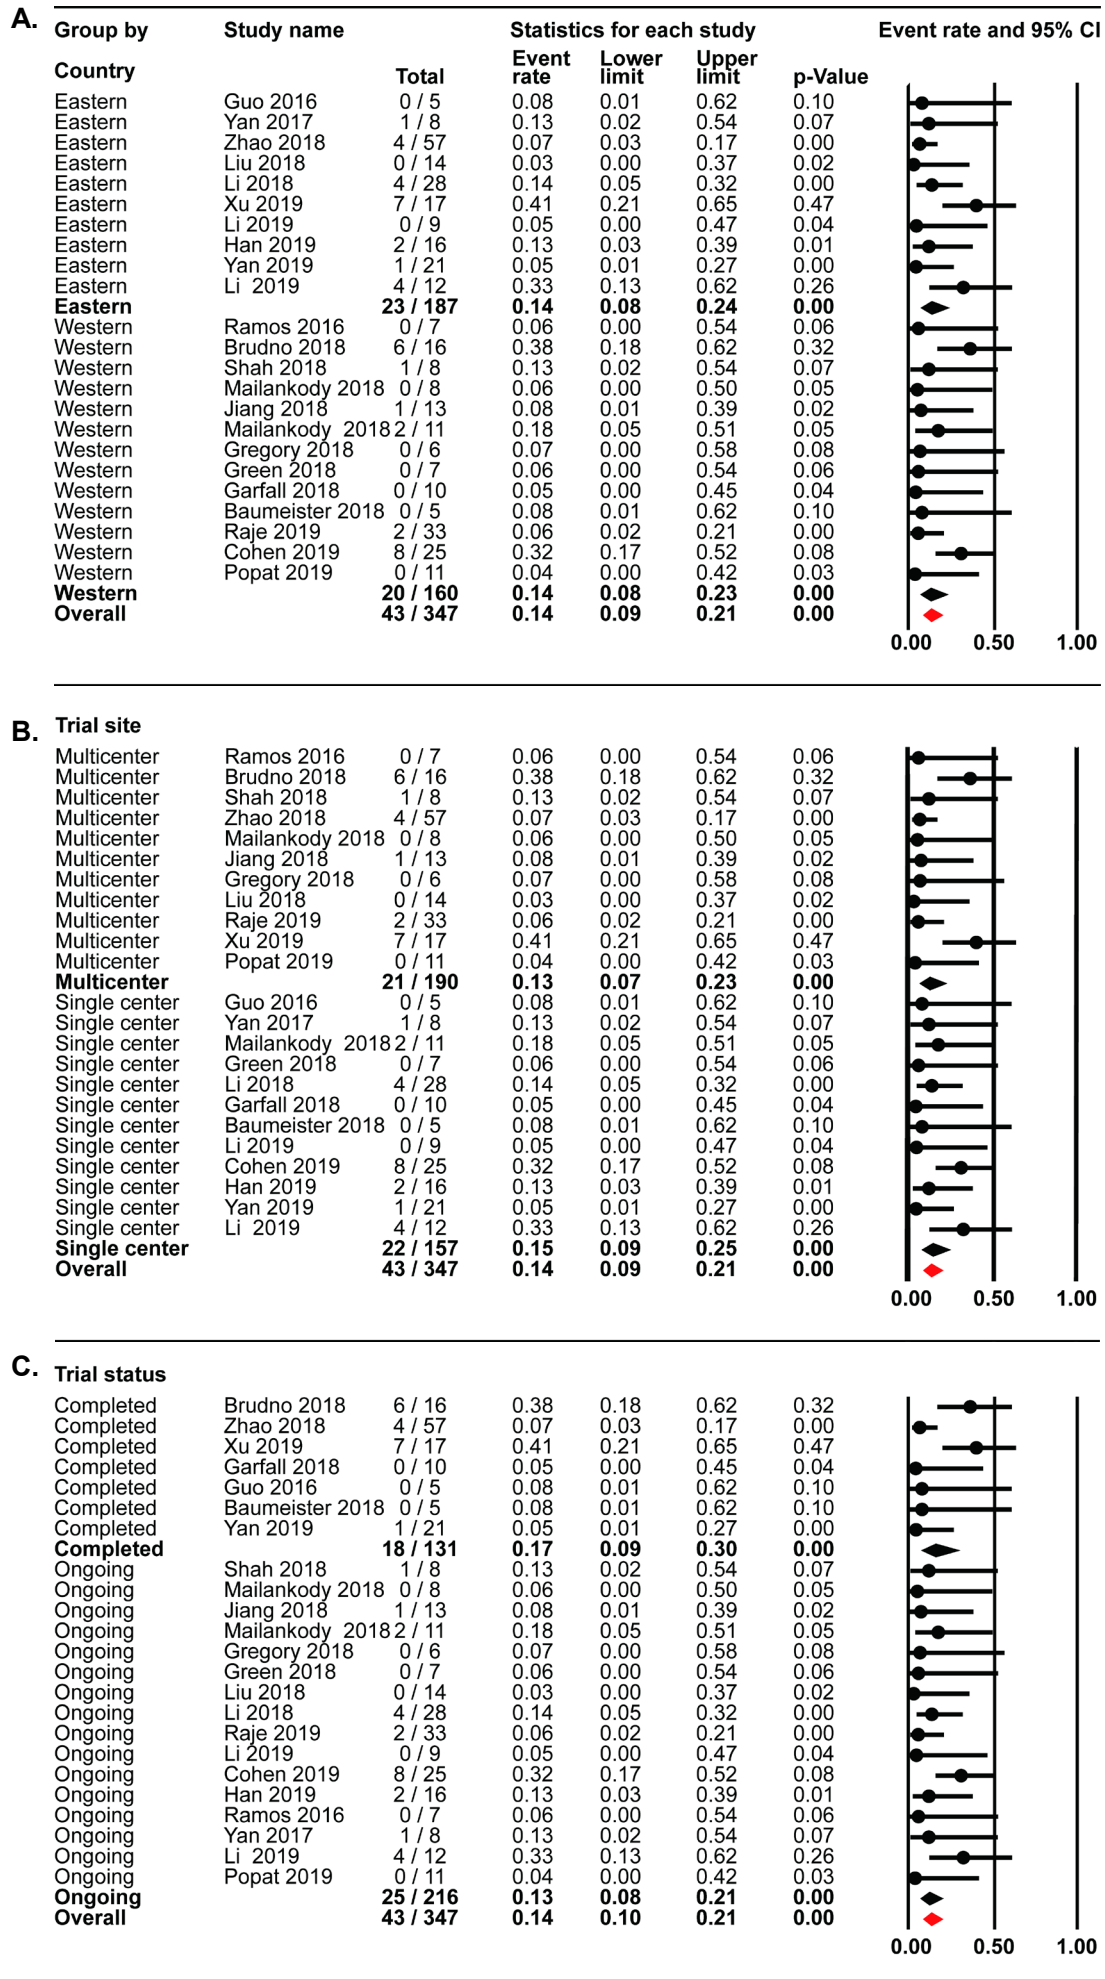

#### D. scFv origin

|                  |                 |                 |             |             |             |             |
|------------------|-----------------|-----------------|-------------|-------------|-------------|-------------|
| Human            | Guo 2016        | 0 / 5           | 0.08        | 0.01        | 0.62        | 0.10        |
| Human            | Mailankody 2018 | 0 / 8           | 0.06        | 0.00        | 0.50        | 0.05        |
| Human            | Jiang 2018      | 1 / 13          | 0.08        | 0.01        | 0.39        | 0.02        |
| Human            | Mailankody 2018 | 2 / 11          | 0.18        | 0.05        | 0.51        | 0.05        |
| Human            | Gregory 2018    | 0 / 6           | 0.07        | 0.00        | 0.58        | 0.08        |
| Human            | Green 2018      | 0 / 7           | 0.06        | 0.00        | 0.54        | 0.06        |
| Human            | Li 2019         | 0 / 9           | 0.05        | 0.00        | 0.47        | 0.04        |
| Human            | Cohen 2019      | 8 / 25          | 0.32        | 0.17        | 0.52        | 0.08        |
| <b>Human</b>     |                 | <b>11 / 84</b>  | <b>0.14</b> | <b>0.06</b> | <b>0.27</b> | <b>0.00</b> |
| Non-human        | Ramos 2016      | 0 / 7           | 0.06        | 0.00        | 0.54        | 0.06        |
| Non-human        | Yan 2017        | 1 / 8           | 0.13        | 0.02        | 0.54        | 0.07        |
| Non-human        | Brudno 2018     | 6 / 16          | 0.38        | 0.18        | 0.62        | 0.32        |
| Non-human        | Shah 2018       | 1 / 8           | 0.13        | 0.02        | 0.54        | 0.07        |
| Non-human        | Zhao 2018       | 4 / 57          | 0.07        | 0.03        | 0.17        | 0.00        |
| Non-human        | Liu 2018        | 0 / 14          | 0.03        | 0.00        | 0.37        | 0.02        |
| Non-human        | Li 2018         | 4 / 28          | 0.14        | 0.05        | 0.32        | 0.00        |
| Non-human        | Raje 2019       | 2 / 33          | 0.06        | 0.02        | 0.21        | 0.00        |
| Non-human        | Xu 2019         | 7 / 17          | 0.41        | 0.21        | 0.65        | 0.47        |
| Non-human        | Han 2019        | 2 / 16          | 0.13        | 0.03        | 0.39        | 0.01        |
| Non-human        | Yan 2019        | 1 / 21          | 0.05        | 0.01        | 0.27        | 0.00        |
| <b>Non-human</b> |                 | <b>28 / 225</b> | <b>0.14</b> | <b>0.08</b> | <b>0.23</b> | <b>0.00</b> |
| <b>Overall</b>   |                 | <b>39 / 309</b> | <b>0.14</b> | <b>0.09</b> | <b>0.21</b> | <b>0.00</b> |

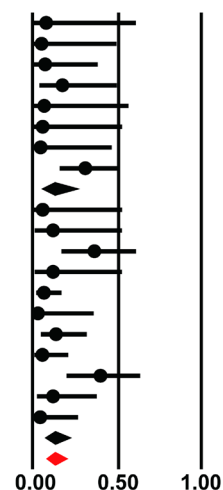

#### E. co-stimulatory domain

|                |                 |                 |             |             |             |             |
|----------------|-----------------|-----------------|-------------|-------------|-------------|-------------|
| 4-1BB          | Guo 2016        | 0 / 5           | 0.08        | 0.01        | 0.62        | 0.10        |
| 4-1BB          | Shah 2018       | 1 / 8           | 0.13        | 0.02        | 0.54        | 0.07        |
| 4-1BB          | Zhao 2018       | 4 / 57          | 0.07        | 0.03        | 0.17        | 0.00        |
| 4-1BB          | Mailankody 2018 | 0 / 8           | 0.06        | 0.00        | 0.50        | 0.05        |
| 4-1BB          | Jiang 2018      | 1 / 13          | 0.08        | 0.01        | 0.39        | 0.02        |
| 4-1BB          | Mailankody 2018 | 2 / 11          | 0.18        | 0.05        | 0.51        | 0.05        |
| 4-1BB          | Gregory 2018    | 0 / 6           | 0.07        | 0.00        | 0.58        | 0.08        |
| 4-1BB          | Green 2018      | 0 / 7           | 0.06        | 0.00        | 0.54        | 0.06        |
| 4-1BB          | Liu 2018        | 0 / 14          | 0.03        | 0.00        | 0.37        | 0.02        |
| 4-1BB          | Garfall 2018    | 0 / 10          | 0.05        | 0.00        | 0.45        | 0.04        |
| 4-1BB          | Raje 2019       | 2 / 33          | 0.06        | 0.02        | 0.21        | 0.00        |
| 4-1BB          | Xu 2019         | 7 / 17          | 0.41        | 0.21        | 0.65        | 0.47        |
| 4-1BB          | Li 2019         | 0 / 9           | 0.05        | 0.00        | 0.47        | 0.04        |
| 4-1BB          | Cohen 2019      | 8 / 25          | 0.32        | 0.17        | 0.52        | 0.08        |
| 4-1BB          | Han 2019        | 2 / 16          | 0.13        | 0.03        | 0.39        | 0.01        |
| 4-1BB          | Yan 2019        | 1 / 21          | 0.05        | 0.01        | 0.27        | 0.00        |
| <b>4-1BB</b>   |                 | <b>28 / 260</b> | <b>0.12</b> | <b>0.07</b> | <b>0.19</b> | <b>0.00</b> |
| CD28           | Ramos 2016      | 0 / 7           | 0.06        | 0.00        | 0.54        | 0.06        |
| CD28           | Brudno 2018     | 6 / 16          | 0.38        | 0.18        | 0.62        | 0.32        |
| CD28           | Li 2018         | 4 / 28          | 0.14        | 0.05        | 0.32        | 0.00        |
| <b>CD28</b>    |                 | <b>10 / 51</b>  | <b>0.21</b> | <b>0.08</b> | <b>0.44</b> | <b>0.02</b> |
| <b>Overall</b> |                 | <b>38 / 311</b> | <b>0.14</b> | <b>0.08</b> | <b>0.22</b> | <b>0.00</b> |

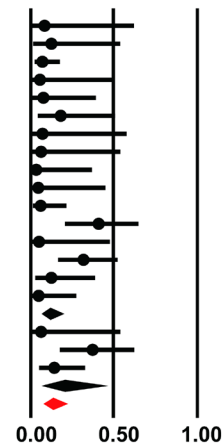

#### F. CARs

|                       |                 |                 |             |             |             |             |
|-----------------------|-----------------|-----------------|-------------|-------------|-------------|-------------|
| 2nd generation        | Guo 2016        | 0 / 5           | 0.08        | 0.01        | 0.62        | 0.10        |
| 2nd generation        | Ramos 2016      | 0 / 7           | 0.06        | 0.00        | 0.54        | 0.06        |
| 2nd generation        | Brudno 2018     | 6 / 16          | 0.38        | 0.18        | 0.62        | 0.32        |
| 2nd generation        | Shah 2018       | 1 / 8           | 0.13        | 0.02        | 0.54        | 0.07        |
| 2nd generation        | Zhao 2018       | 4 / 57          | 0.07        | 0.03        | 0.17        | 0.00        |
| 2nd generation        | Mailankody 2018 | 0 / 8           | 0.06        | 0.00        | 0.50        | 0.05        |
| 2nd generation        | Jiang 2018      | 1 / 13          | 0.08        | 0.01        | 0.39        | 0.02        |
| 2nd generation        | Mailankody 2018 | 2 / 11          | 0.18        | 0.05        | 0.51        | 0.05        |
| 2nd generation        | Gregory 2018    | 0 / 6           | 0.07        | 0.00        | 0.58        | 0.08        |
| 2nd generation        | Green 2018      | 0 / 7           | 0.06        | 0.00        | 0.54        | 0.06        |
| 2nd generation        | Liu 2018        | 0 / 14          | 0.03        | 0.00        | 0.37        | 0.02        |
| 2nd generation        | Li 2018         | 4 / 28          | 0.14        | 0.05        | 0.32        | 0.00        |
| 2nd generation        | Garfall 2018    | 0 / 10          | 0.05        | 0.00        | 0.45        | 0.04        |
| 2nd generation        | Baumeister 2018 | 0 / 5           | 0.08        | 0.01        | 0.62        | 0.10        |
| 2nd generation        | Raje 2019       | 2 / 33          | 0.06        | 0.02        | 0.21        | 0.00        |
| 2nd generation        | Xu 2019         | 7 / 17          | 0.41        | 0.21        | 0.65        | 0.47        |
| 2nd generation        | Li 2019         | 0 / 9           | 0.05        | 0.00        | 0.47        | 0.04        |
| 2nd generation        | Cohen 2019      | 8 / 25          | 0.32        | 0.17        | 0.52        | 0.08        |
| 2nd generation        | Han 2019        | 2 / 16          | 0.13        | 0.03        | 0.39        | 0.01        |
| 2nd generation        | Yan 2019        | 1 / 21          | 0.05        | 0.01        | 0.27        | 0.00        |
| <b>2nd generation</b> |                 | <b>38 / 316</b> | <b>0.14</b> | <b>0.09</b> | <b>0.20</b> | <b>0.00</b> |
| 3rd generation        | Yan 2017        | 1 / 8           | 0.13        | 0.02        | 0.54        | 0.07        |
| 3rd generation        | Popat 2019      | 0 / 11          | 0.04        | 0.00        | 0.42        | 0.03        |
| <b>3rd generation</b> |                 | <b>1 / 19</b>   | <b>0.08</b> | <b>0.01</b> | <b>0.37</b> | <b>0.01</b> |
| <b>Overall</b>        |                 | <b>39 / 335</b> | <b>0.13</b> | <b>0.09</b> | <b>0.20</b> | <b>0.00</b> |

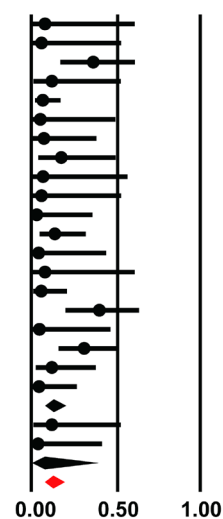

### G. Antigen target

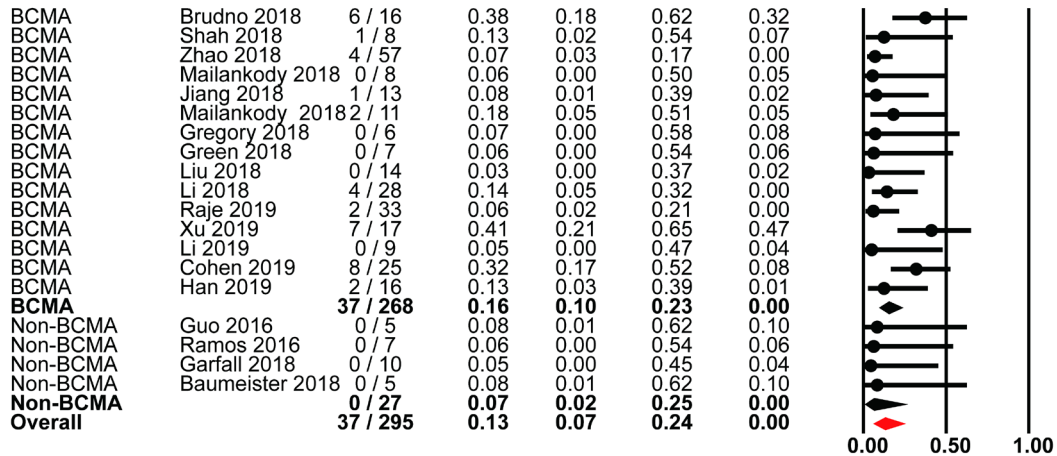

### H. CAR-T regimen

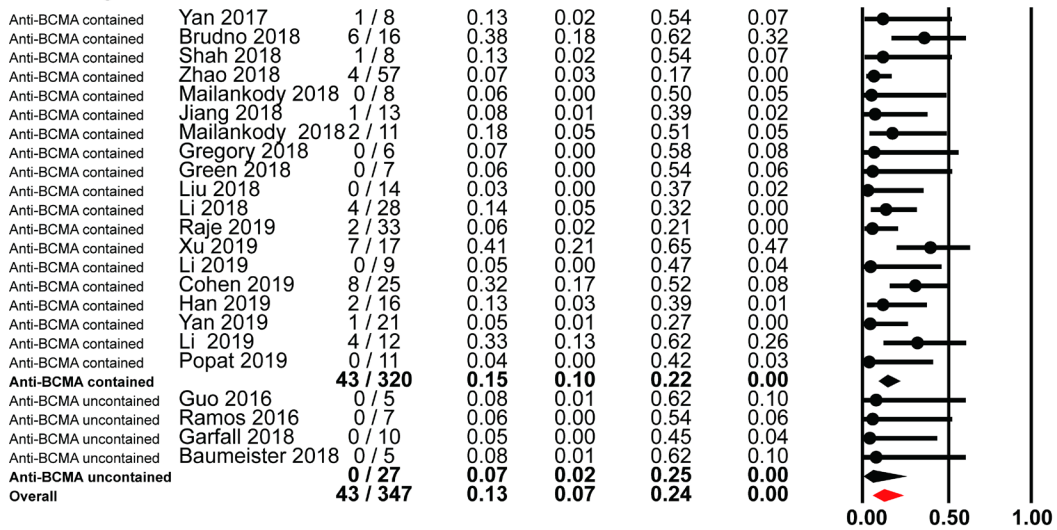

### I. CAR-T therapy mode

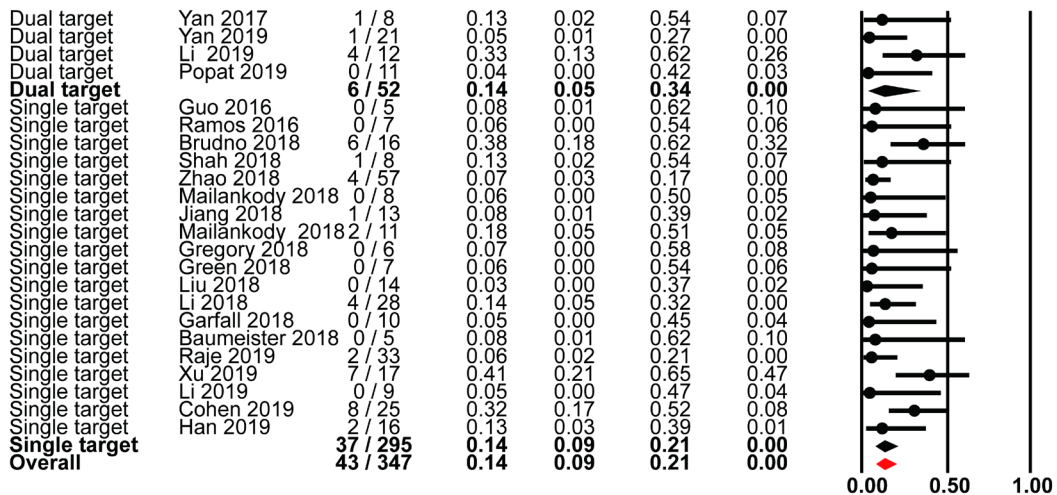

Figure S3 Subgroup analysis of NT for RRMM with CAR-T.

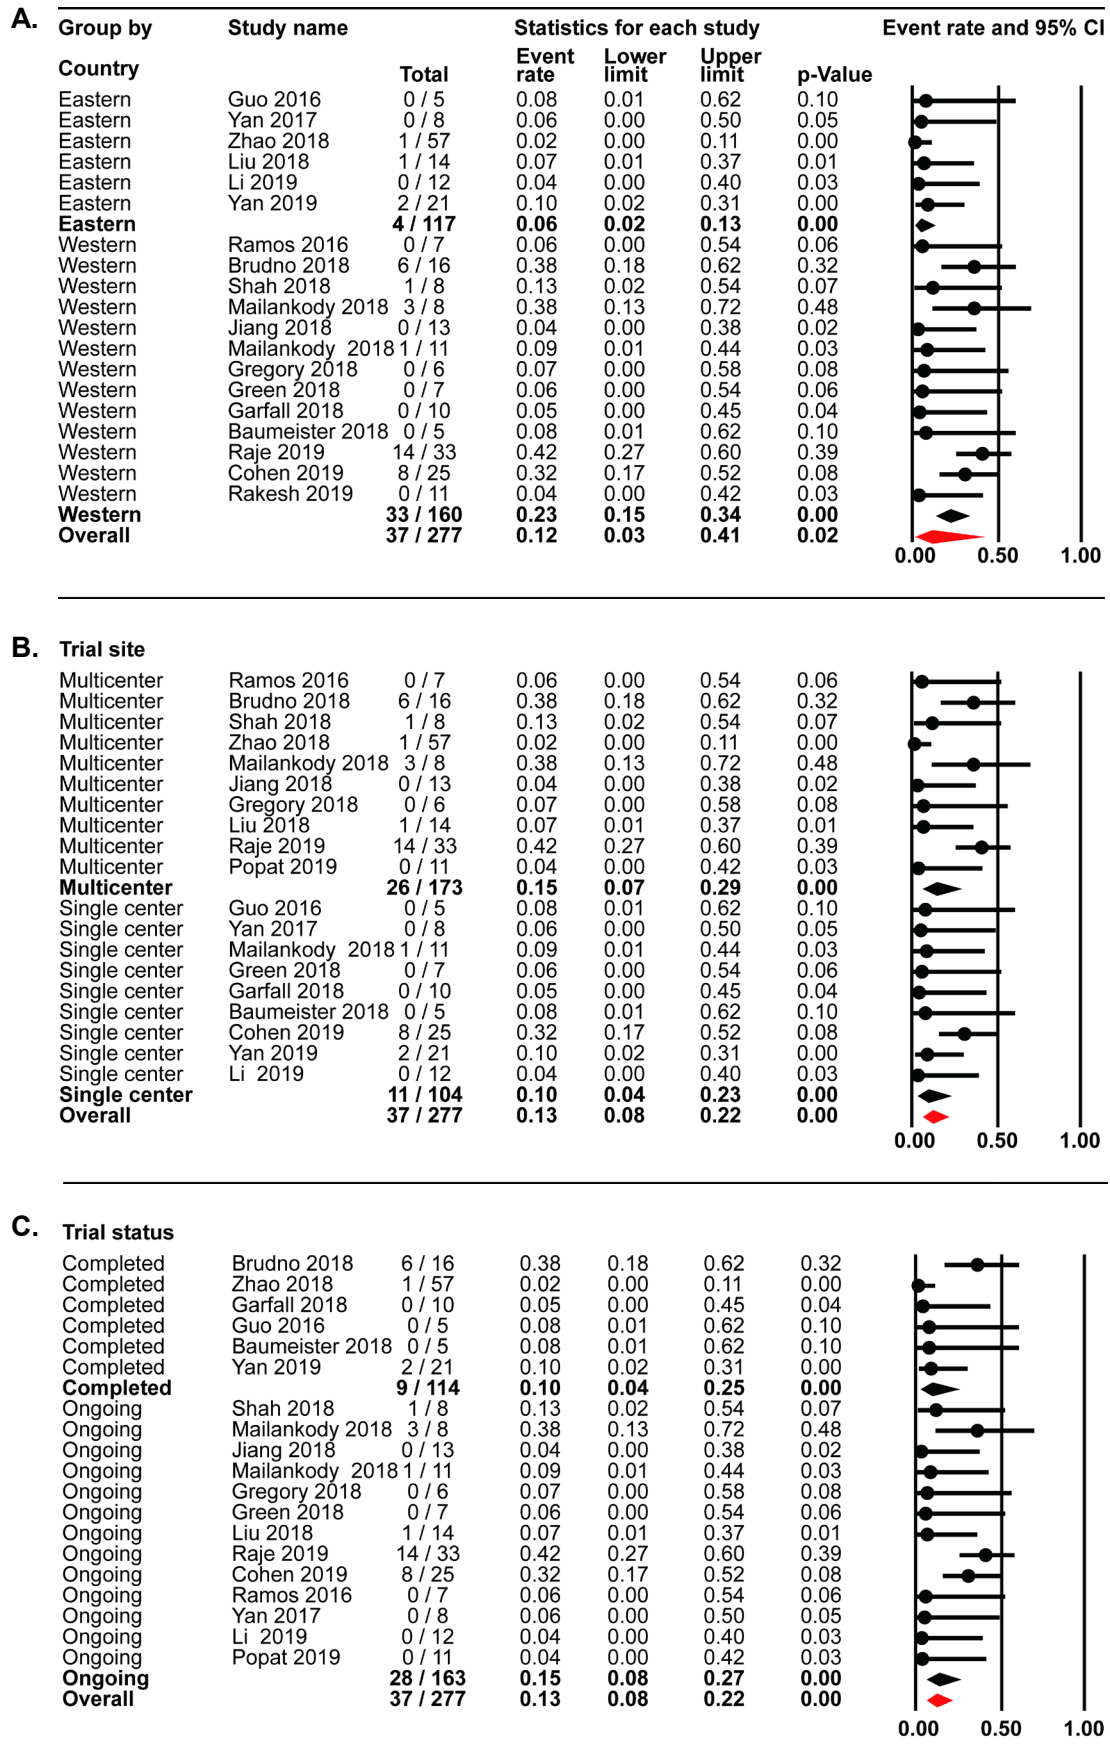



#### D. scFv origin

|                  |                 |                 |             |             |             |             |
|------------------|-----------------|-----------------|-------------|-------------|-------------|-------------|
| Human            | Guo 2016        | 0 / 5           | 0.08        | 0.01        | 0.62        | 0.10        |
| Human            | Mailankody 2018 | 3 / 8           | 0.38        | 0.13        | 0.72        | 0.48        |
| Human            | Jiang 2018      | 0 / 13          | 0.04        | 0.00        | 0.38        | 0.02        |
| Human            | Mailankody 2018 | 1 / 11          | 0.09        | 0.01        | 0.44        | 0.03        |
| Human            | Gregory 2018    | 0 / 6           | 0.07        | 0.00        | 0.58        | 0.08        |
| Human            | Green 2018      | 0 / 7           | 0.06        | 0.00        | 0.54        | 0.06        |
| Human            | Cohen 2019      | 8 / 25          | 0.32        | 0.17        | 0.52        | 0.08        |
| <b>Human</b>     |                 | <b>12 / 75</b>  | <b>0.16</b> | <b>0.06</b> | <b>0.35</b> | <b>0.00</b> |
| Non-human        | Ramos 2016      | 0 / 7           | 0.06        | 0.00        | 0.54        | 0.06        |
| Non-human        | Yan 2017        | 0 / 8           | 0.06        | 0.00        | 0.50        | 0.05        |
| Non-human        | Brudno 2018     | 6 / 16          | 0.38        | 0.18        | 0.62        | 0.32        |
| Non-human        | Shah 2018       | 1 / 8           | 0.13        | 0.02        | 0.54        | 0.07        |
| Non-human        | Zhao 2018       | 1 / 57          | 0.02        | 0.00        | 0.11        | 0.00        |
| Non-human        | Liu 2018        | 1 / 14          | 0.07        | 0.01        | 0.37        | 0.01        |
| Non-human        | Baumeister 2018 | 0 / 5           | 0.08        | 0.01        | 0.62        | 0.10        |
| Non-human        | Raje 2019       | 14 / 33         | 0.42        | 0.27        | 0.60        | 0.39        |
| Non-human        | Yan 2019        | 2 / 21          | 0.10        | 0.02        | 0.31        | 0.00        |
| <b>Non-human</b> |                 | <b>25 / 169</b> | <b>0.14</b> | <b>0.06</b> | <b>0.28</b> | <b>0.00</b> |
| <b>Overall</b>   |                 | <b>37 / 244</b> | <b>0.15</b> | <b>0.08</b> | <b>0.25</b> | <b>0.00</b> |

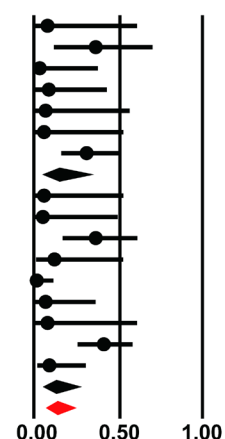

#### E. co-stimulatory domain

|                |                 |                 |             |             |             |             |
|----------------|-----------------|-----------------|-------------|-------------|-------------|-------------|
| 4-1BB          | Guo 2016        | 0 / 5           | 0.08        | 0.01        | 0.62        | 0.10        |
| 4-1BB          | Shah 2018       | 1 / 8           | 0.13        | 0.02        | 0.54        | 0.07        |
| 4-1BB          | Mailankody 2018 | 3 / 8           | 0.38        | 0.13        | 0.72        | 0.48        |
| 4-1BB          | Jiang 2018      | 0 / 13          | 0.04        | 0.00        | 0.38        | 0.02        |
| 4-1BB          | Mailankody 2018 | 1 / 11          | 0.09        | 0.01        | 0.44        | 0.03        |
| 4-1BB          | Gregory 2018    | 0 / 6           | 0.07        | 0.00        | 0.58        | 0.08        |
| 4-1BB          | Green 2018      | 0 / 7           | 0.06        | 0.00        | 0.54        | 0.06        |
| 4-1BB          | Garfall 2018    | 0 / 10          | 0.05        | 0.00        | 0.45        | 0.04        |
| 4-1BB          | Zhao 2018       | 1 / 57          | 0.02        | 0.00        | 0.11        | 0.00        |
| 4-1BB          | Liu 2018        | 1 / 14          | 0.07        | 0.01        | 0.37        | 0.01        |
| 4-1BB          | Raje 2019       | 14 / 33         | 0.42        | 0.27        | 0.60        | 0.39        |
| 4-1BB          | Cohen 2019      | 8 / 25          | 0.32        | 0.17        | 0.52        | 0.08        |
| 4-1BB          | Yan 2019        | 2 / 21          | 0.10        | 0.02        | 0.31        | 0.00        |
| <b>4-1BB</b>   |                 | <b>31 / 218</b> | <b>0.13</b> | <b>0.07</b> | <b>0.24</b> | <b>0.00</b> |
| CD28           | Ramos 2016      | 0 / 7           | 0.06        | 0.00        | 0.54        | 0.06        |
| CD28           | Brudno 2018     | 6 / 16          | 0.38        | 0.18        | 0.62        | 0.32        |
| <b>CD28</b>    |                 | <b>6 / 23</b>   | <b>0.25</b> | <b>0.05</b> | <b>0.66</b> | <b>0.22</b> |
| <b>Overall</b> |                 | <b>37 / 241</b> | <b>0.15</b> | <b>0.08</b> | <b>0.25</b> | <b>0.00</b> |

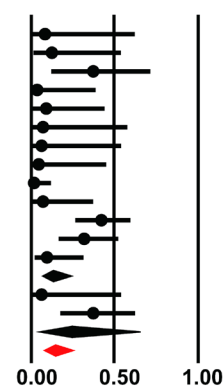

#### F. CARs

|                       |                 |                 |             |             |             |             |
|-----------------------|-----------------|-----------------|-------------|-------------|-------------|-------------|
| 2nd generation        | Ramos 2016      | 0 / 7           | 0.06        | 0.00        | 0.54        | 0.06        |
| 2nd generation        | Guo 2016        | 0 / 5           | 0.08        | 0.01        | 0.62        | 0.10        |
| 2nd generation        | Brudno 2018     | 6 / 16          | 0.38        | 0.18        | 0.62        | 0.32        |
| 2nd generation        | Shah 2018       | 1 / 8           | 0.13        | 0.02        | 0.54        | 0.07        |
| 2nd generation        | Mailankody 2018 | 3 / 8           | 0.38        | 0.13        | 0.72        | 0.48        |
| 2nd generation        | Jiang 2018      | 0 / 13          | 0.04        | 0.00        | 0.38        | 0.02        |
| 2nd generation        | Mailankody 2018 | 1 / 11          | 0.09        | 0.01        | 0.44        | 0.03        |
| 2nd generation        | Gregory 2018    | 0 / 6           | 0.07        | 0.00        | 0.58        | 0.08        |
| 2nd generation        | Green 2018      | 0 / 7           | 0.06        | 0.00        | 0.54        | 0.06        |
| 2nd generation        | Garfall 2018    | 0 / 10          | 0.05        | 0.00        | 0.45        | 0.04        |
| 2nd generation        | Zhao 2018       | 1 / 57          | 0.02        | 0.00        | 0.11        | 0.00        |
| 2nd generation        | Liu 2018        | 1 / 14          | 0.07        | 0.01        | 0.37        | 0.01        |
| 2nd generation        | Baumeister 2018 | 0 / 5           | 0.08        | 0.01        | 0.62        | 0.10        |
| 2nd generation        | Raje 2019       | 14 / 33         | 0.42        | 0.27        | 0.60        | 0.39        |
| 2nd generation        | Cohen 2019      | 8 / 25          | 0.32        | 0.17        | 0.52        | 0.08        |
| 2nd generation        | Yan 2019        | 2 / 21          | 0.10        | 0.02        | 0.31        | 0.00        |
| <b>2nd generation</b> |                 | <b>37 / 246</b> | <b>0.15</b> | <b>0.09</b> | <b>0.25</b> | <b>0.00</b> |
| 3rd generation        | Yan 2017        | 0 / 8           | 0.06        | 0.00        | 0.50        | 0.05        |
| 3rd generation        | Rakesh 2019     | 0 / 11          | 0.04        | 0.00        | 0.42        | 0.03        |
| <b>3rd generation</b> |                 | <b>0 / 19</b>   | <b>0.05</b> | <b>0.01</b> | <b>0.33</b> | <b>0.01</b> |
| <b>Overall</b>        |                 | <b>37 / 265</b> | <b>0.14</b> | <b>0.07</b> | <b>0.25</b> | <b>0.00</b> |

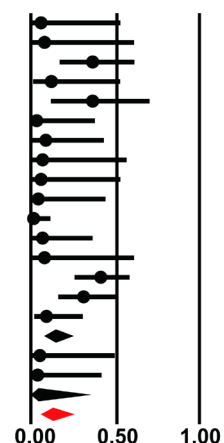



### G. Antigen target

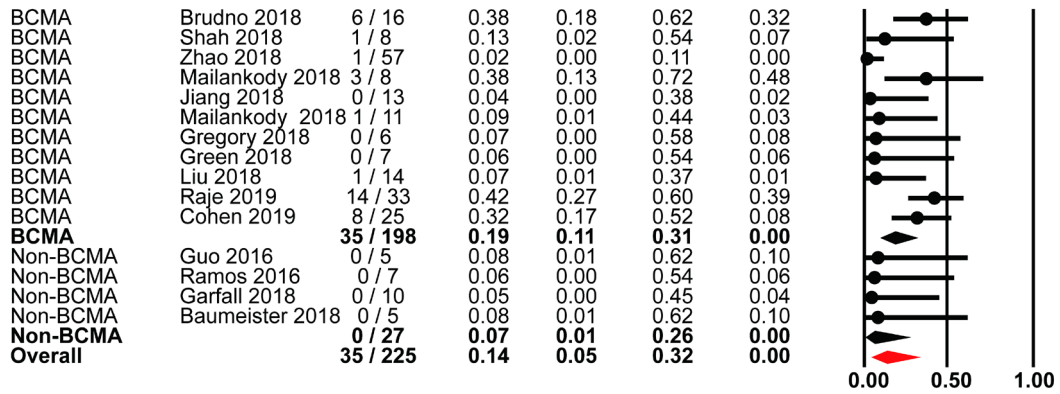

### H. CAR-T regimen

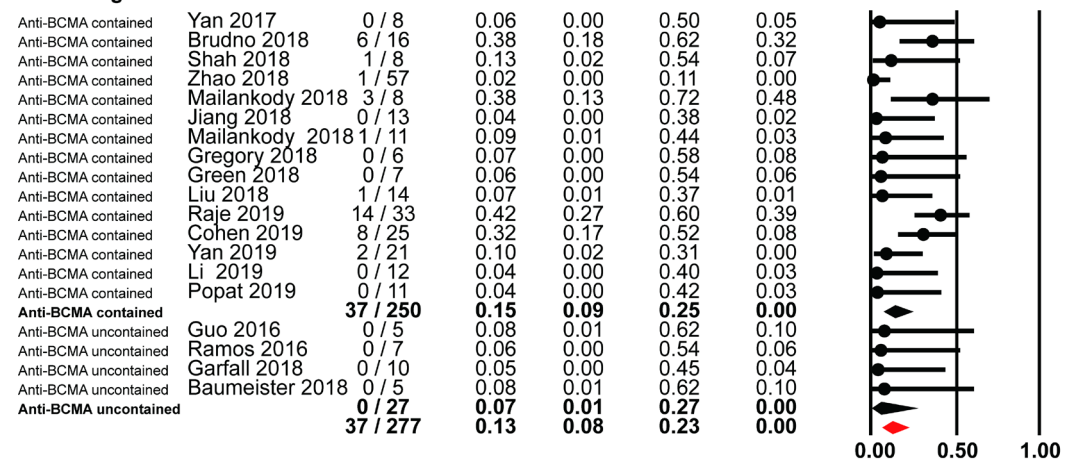

### I. CAR-T therapy mode

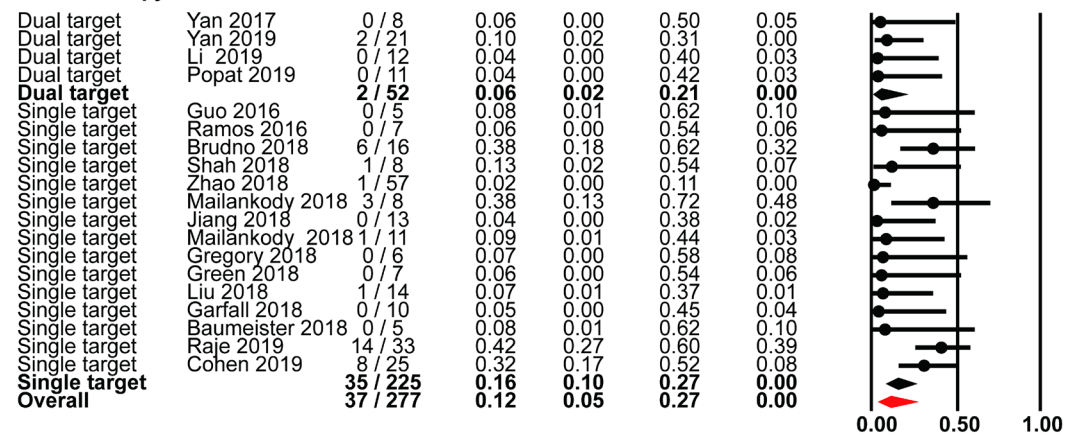

**Figure S4:**

**Funnel plot for RRMM with CAR-T reporting Overall Response (A), Complete Response (B), MRD negativity (C), Relapse at last follow-up (D), Overall Survival at last follow-up (E), CRS (F) and NT (G).**

A

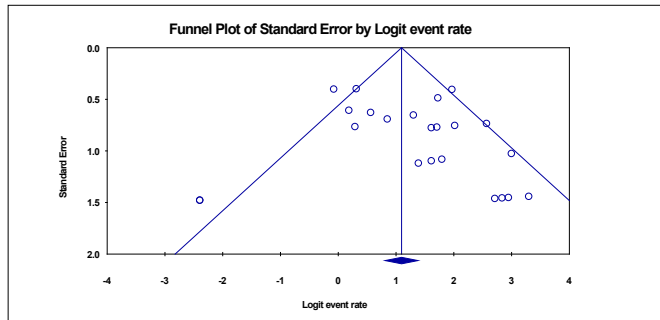

B

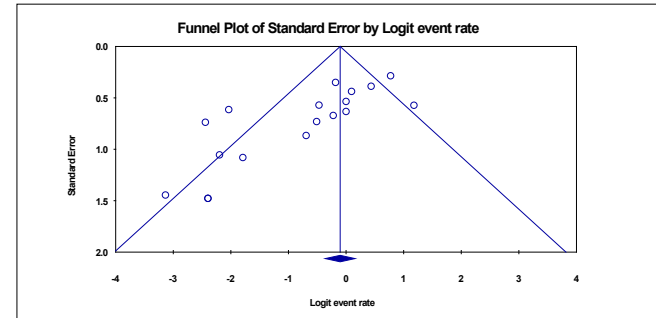

C

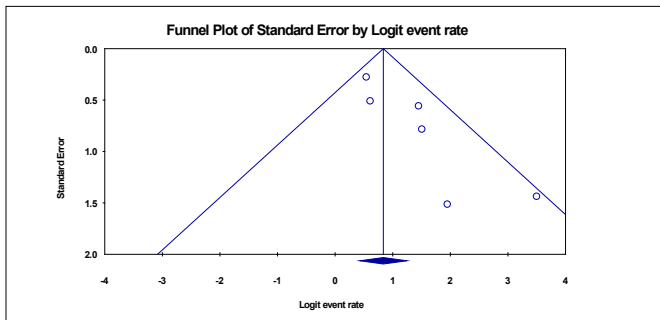

D

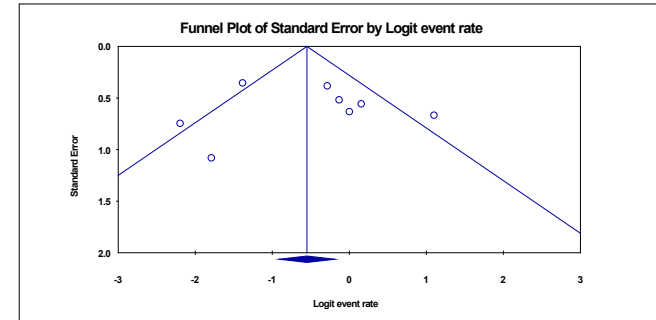

E

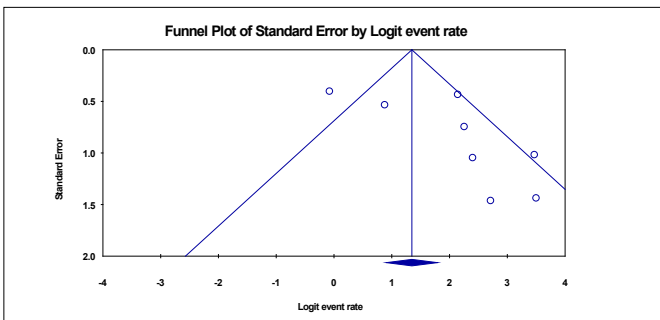

F

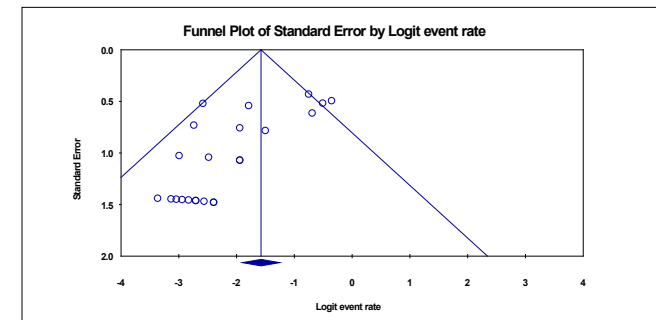

G

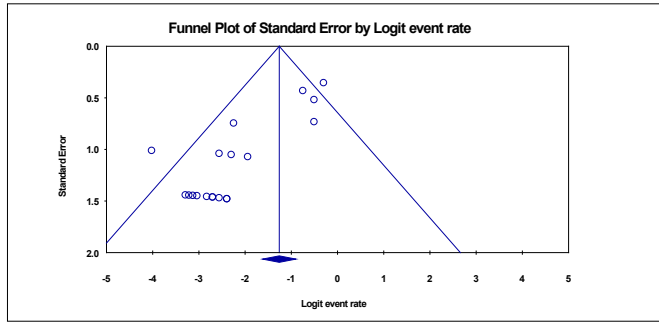

Supplement: ijmsv18p1786s1.pdf [file ijmsv18p1786s1.pdf]
